# Supplementary material
Source: Springer Nature journal article supplement (https://www.springermedizin.de/resource/supplementary/13045_2011_188_MOESM1_ESM.pdf/9660832)

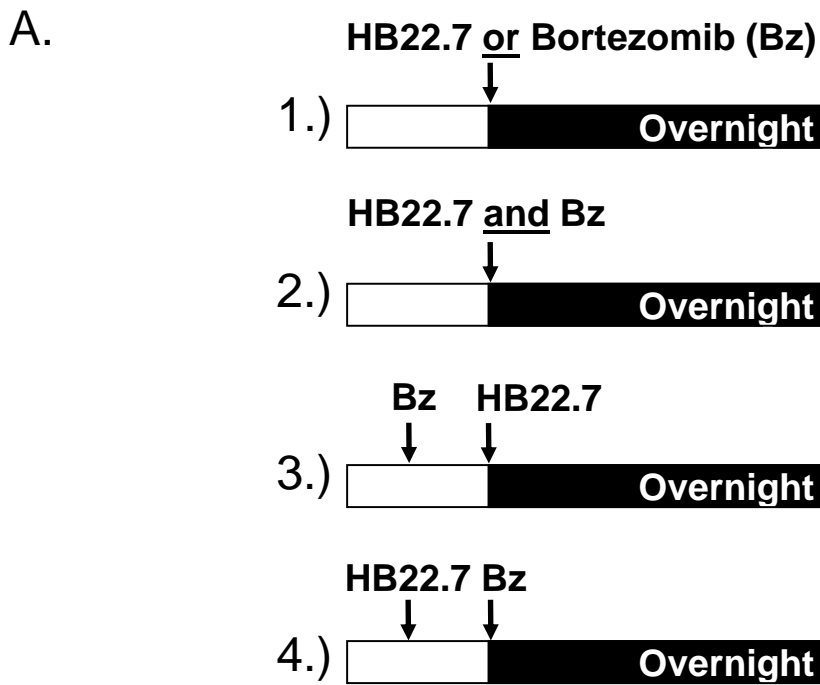

**B.**

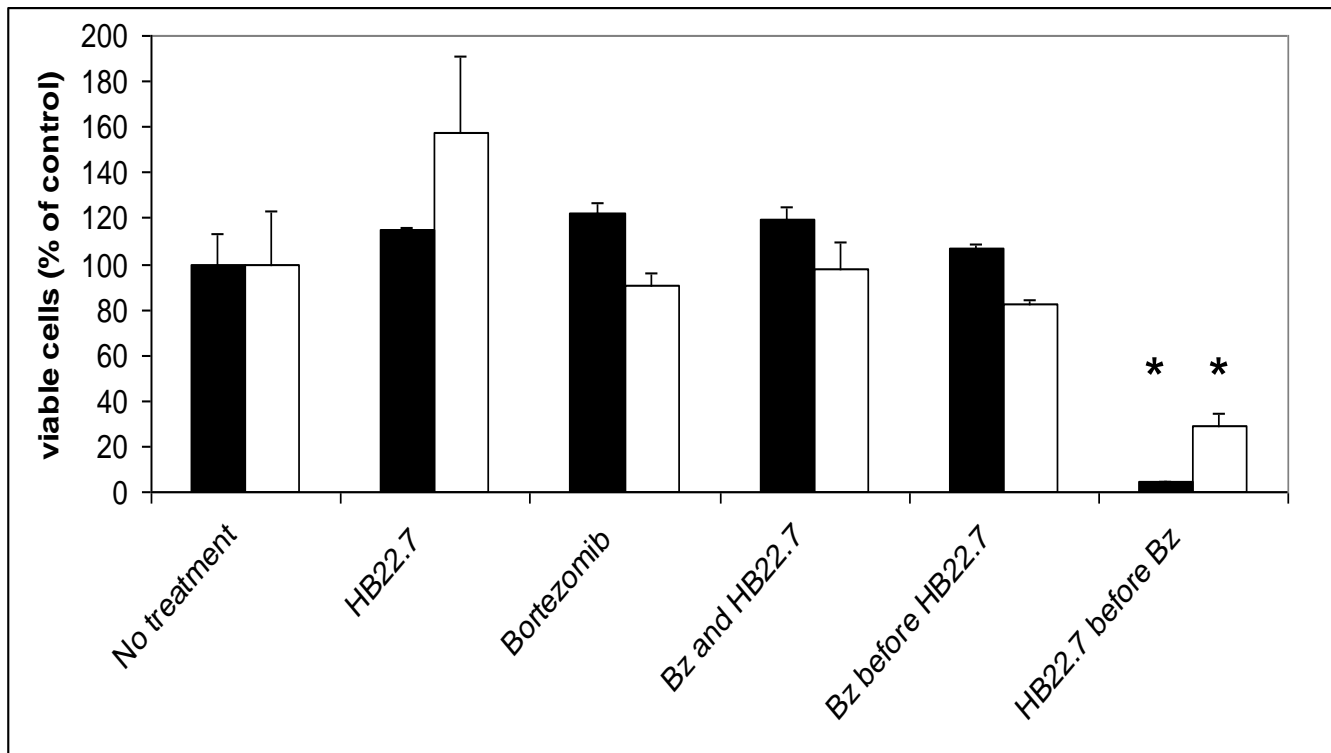

Supplement: MOESM1 [file 9660832]
